# Supplementary material
Source: HighWire-hosted journal article supplement (https://spcare.bmj.com/content/bmjspcare-2016-001119)
Supplement: inline-supplementary-material-1 [file inline-supplementary-material-1.pdf]

# APPENDIX 1

## Questionnaire 1

1. How many Palliative Care Specialists do you provide?

If possible, please specify numbers of Palliative Care Specialists broken down by:

- a. Consultants in Palliative Medicine
  - b. Specialists Nurses employed as a clinical nurse specialist or a consultant nurse in palliative care
  - c. Allied health Professionals, please specify?
2. What is your annual budget dedicated to Specialist Palliative Care Services commissioned for the current financial year, 2015-2016? We understand there may be differences in terms and if it is impossible for you to give a precise figure for whatever reason, please give your best estimate.
  3. What is your annual budget for other Palliative Care or End of Life Care Services commissioned for the current financial year, 2015-2016?

Please specify each unit by name?

4. How many beds are there specifically dedicated to Specialist Palliative Care Services

If possible please break down by:

- a. Hospices: Number of beds in each hospice inpatient unit, please specify each unit by name.
  - b. Other Providers: Number of beds in each provider inpatient unit, please specify each unit by name.
  - c. Hospital: Number of beds in each hospital inpatient unit, please specify each unit by name.
5. Do you provide for seven day admissions to Specialist Palliative Care Beds? Yes/No

If yes, please provide further information on whether these admissions are available in:

- a. All hospice beds you commission
- b. Some hospice beds, and if so how many?
- c. NHS funded Specialist Palliative Care beds in hospitals, and if so how many?
- d. NHS funded Specialist Palliative Care beds in another facility, and if so how many?
- e. Any other facility, please specify.

6. Do you commission seven day Specialist Palliative Care Services? Yes/No

If yes, please give their hours of operations and the specific services available.

7. Do you commission seven day Specialist Palliative Care Services for patients in their own homes? Yes/No

If yes, please specify.

8. Do you provide 24 hour/seven day Specialist Palliative Care advice? Yes/No

If yes,

- (a) Is this advice from a consultant to all other out of hour's healthcare professionals in your area? Yes/No
- (b) Is this direct advice to patients and their carers? Yes/No
- (c) If by another means, please specify what type of advice is available and how this advice is given.

9. In hospitals, do you provide Hospital Specialist Palliative Care Support Teams? Yes/No

Please give details of which hospitals.

10. Do you commission seven-day hospital acute pain control team services?

11. As part of a Specialist Palliative Care Service, do you require them to educate other healthcare professionals? Yes/No

If yes, please specify.

For the avoidance of doubt, the term 'specialist palliative care' refers to care provided by professionals who have undergone specialist training in palliative care and who are members of a specialist palliative care team which included specialists in palliative medicine and palliative nursing
